# Supplementary material for: Comparative Metabolome Profile between Tobacco and Soybean Grown under Water-Stressed Conditions
Source: Hindawi journal article supplement (doi:10.1155/2017/3065251), 2017-01-01
Supplement: f1 [file 3065251.f1.pdf]

Supplemental Data

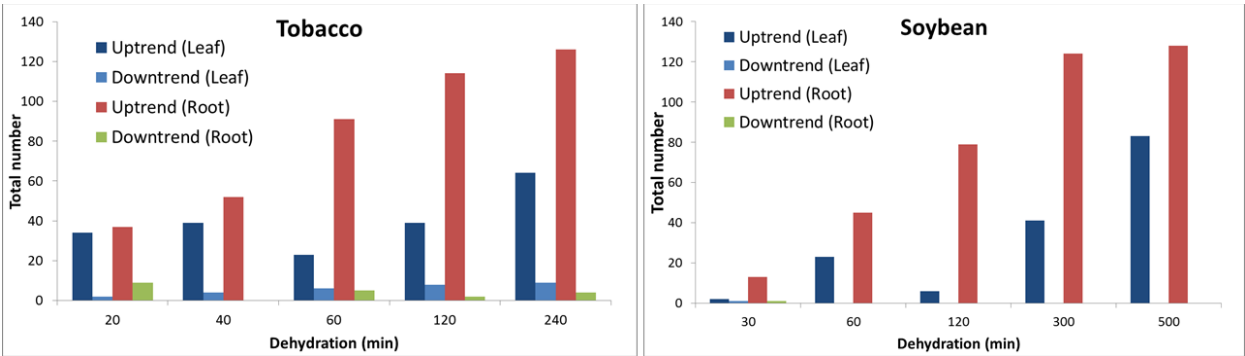

Supplemental Fig. 1. Total number of metabolites observed in tobacco and soybean leaves and roots with significant fold change (FC) that exhibit up or down trend at each dehydration time point. Significant difference was inferred at  $p \leq 0.05$  using Welch's t-test.

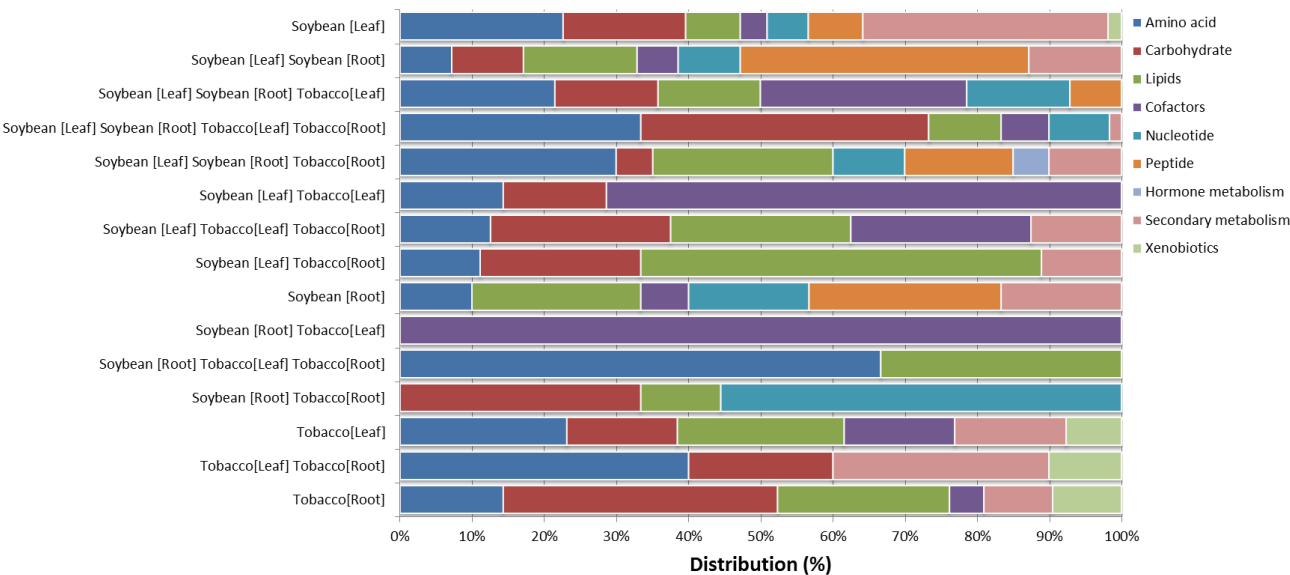

Supplemental Fig. 2. Distribution of metabolites shared between tobacco and soybean across tissue samples.

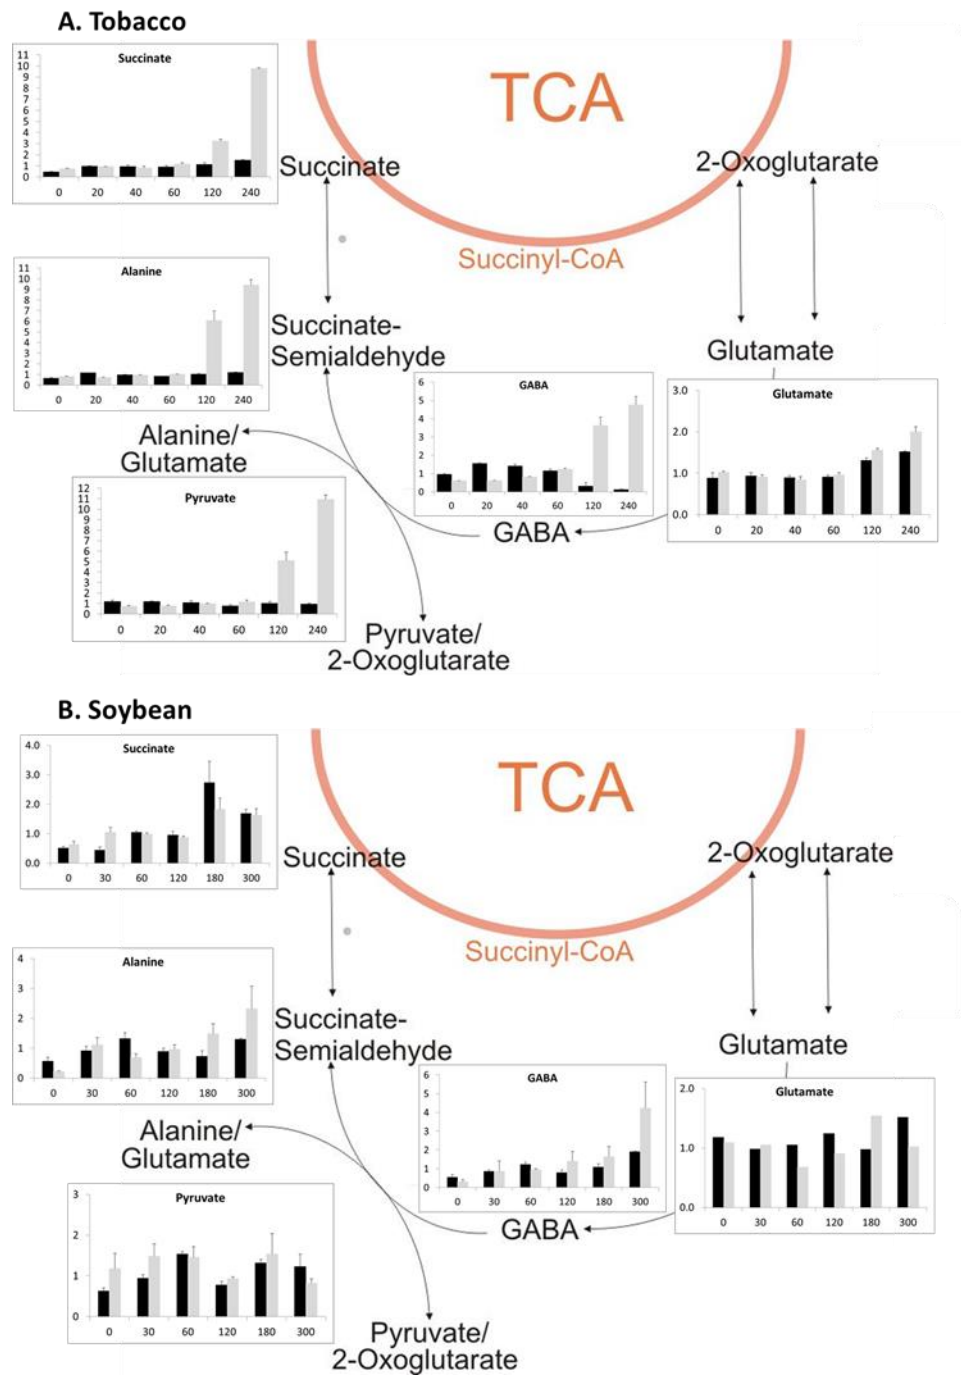

Supplemental Fig. 2. GABA shunt pathway. Leaf samples are in black and root samples are in grey. Data are mean and standard error of three biological replicates.
